# Supplementary material for: Manipulation of the Rashba effect in layered tellurides MTe (M = Ge, Sn, Pb)
Source: Royal Society of Chemistry journal article supplement (doi:10.1039/d0tc00003e), 2020-01-01
Supplement: d0tc00003e1.pdf [file d0tc00003e1.pdf]

Supplementary Information

Manipulation of Rashba effect in layered tellurides MTe (M=Ge, Sn, Pb)

Chang Liu<sup>1</sup>, Heng Gao<sup>1</sup>, Yongchang Li<sup>1</sup>, Kangying Wang<sup>1</sup>, Lee A. Burton<sup>1</sup>, and Wei Ren<sup>1,2,3,\*</sup>

<sup>1</sup> Department of Physics, State Key Laboratory of Advanced Special Steel, and International Center of Quantum and Molecular Structures, Shanghai University, Shanghai 200444, China

<sup>2</sup> Materials Genome Institute and Shanghai Key Laboratory of High Temperature Superconductors, Shanghai University, Shanghai 200444, China

<sup>3</sup> State Key Laboratory of Solidification Processing, Northwestern Polytechnical University, Xi'an 710072, China

\* renwei@shu.edu.cn

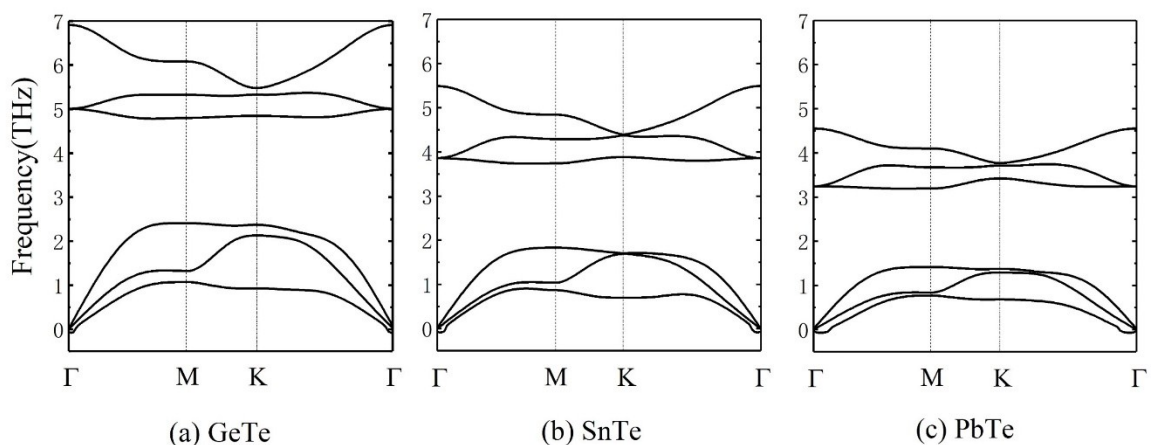

Figure.S1. Phonon spectra of (a) GeTe monolayer, (b) SnTe monolayer and (c) PbTe monolayer.

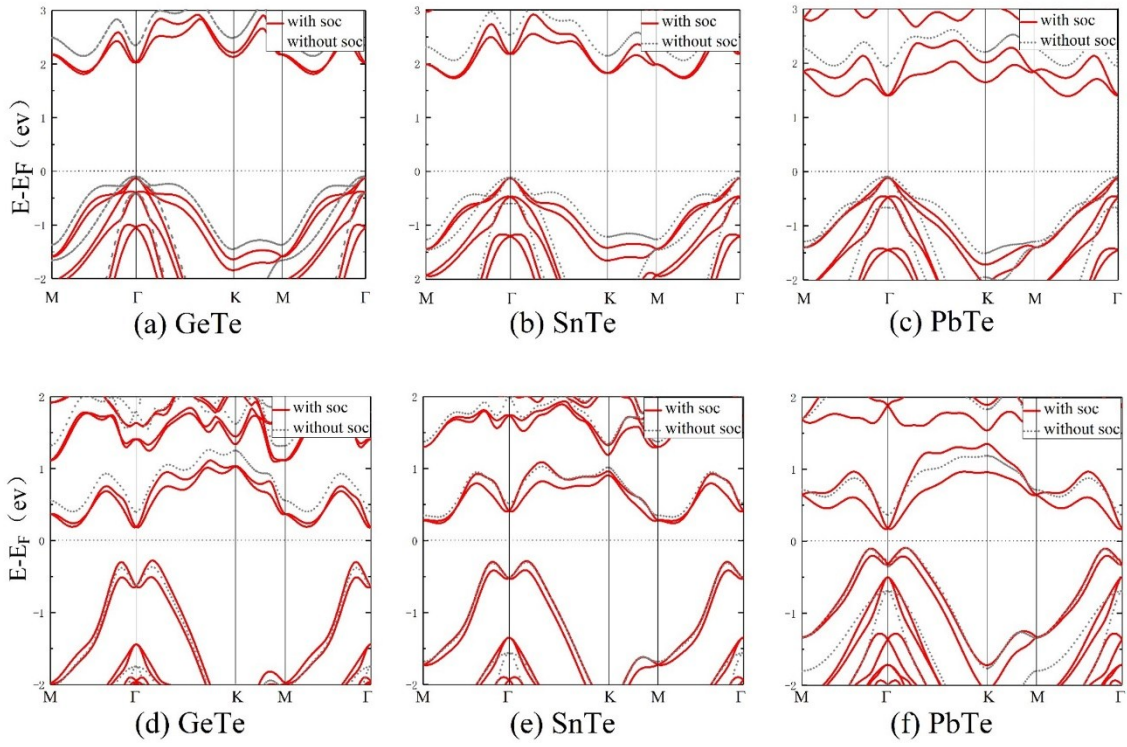

Figure.S2. Band structures of MTe monolayer (a-c) and bilayer (d-f) at the HSE06 level with and without inclusion of SOC.

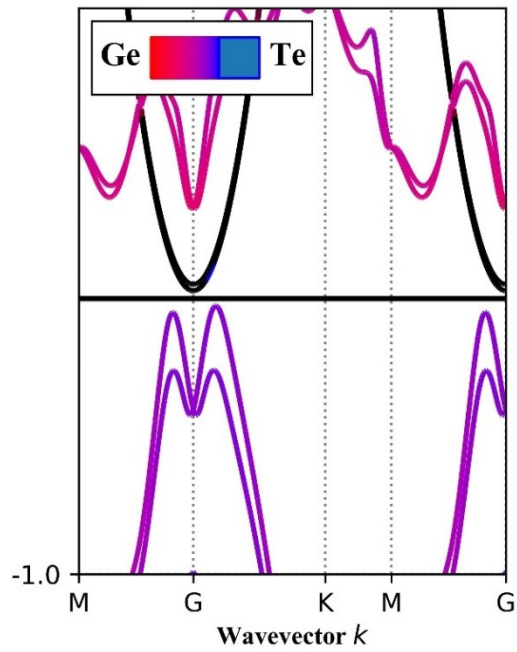

Figure S3. Band structure of bilayer GeTe under a large external electric field of  $0.4\text{V}/\text{\AA}$ .
